# Supplementary material for: Nanoflower-like high-entropy Ni–Fe–Cr–Mn–Co (oxy)hydroxides for oxygen evolution
Source: Royal Society of Chemistry journal article supplement (doi:10.1039/d3cc04023b), 2023-01-01
Supplement: d3cc04023b1.pdf [file d3cc04023b1.pdf]

## Supporting Information

### **Nanoflower-like high-entropy Ni-Fe-Cr-Mn-Co (oxy)hydroxides for oxygen evolution**

Mingyuan Shi<sup>a,b</sup>, Tianmi Tang<sup>b</sup>, Liyuan Xiao<sup>b</sup>, Jingyi Han<sup>b</sup>, Xue Bai<sup>b</sup>, Yuhang Sun<sup>a,b</sup>,  
Siyu Chen<sup>b</sup>, Jingru Sun<sup>b</sup>, Yuanyuan Ma<sup>a,\*</sup>, and Jingqi Guan<sup>b,\*</sup>

<sup>a</sup> College of Chemistry and Chemical Engineering, Qiqihar University, Heilongjiang Province 161006, China. \*E-mail: [mayuanyuan1219@126.com](mailto:mayuanyuan1219@126.com) (Y.Y. Ma)

<sup>b</sup> Institute of Physical Chemistry, College of Chemistry, Jilin University, 2519 Jiefang Road, Changchun 130021, P. R. China. \*E-mail: [guanjq@jlu.edu.cn](mailto:guanjq@jlu.edu.cn) (J.Q. Guan)

### **Synthesis of FeNiCrMnCoOOH/NF**

Nickel NF foam (2 cm × 2 cm) was treated in 3 M HCl, distilled water and absolute ethanol for 15 min, respectively. Then, 0.404 g Fe(NO<sub>3</sub>)<sub>3</sub>·9H<sub>2</sub>O, 0.291 g Co(NO<sub>3</sub>)<sub>2</sub>·6H<sub>2</sub>O, 0.2326 g Ni(NO<sub>3</sub>)<sub>2</sub>·6H<sub>2</sub>O, 0.32 g Cr(NO<sub>3</sub>)<sub>3</sub>·9H<sub>2</sub>O, 0.136 g MnSO<sub>4</sub>·H<sub>2</sub>O, 0.24 g NH<sub>2</sub>CONH<sub>2</sub> and 0.075 g PVP were dissolved in 20 mL of H<sub>2</sub>O via ultrasonic treatment. Subsequently, the solution was transferred into a 25 mL Teflon autoclave and a processed piece of NF was added, which was heated at 100 °C for 12 hours. Finally, the obtained NF was washed three times with ethanol and distilled water and dried at 60 °C for 12 hours, which was nominated as

FeNiCrMnCoOOH/NF. For comparison, the quaternary FeNiCrMnOOH/NF, ternary FeNiMnOOH/NF, binary NiMnOOH/NF, unary NiOOH/NF and four other high-entropy (oxy)hydroxides FeNiCrMnAlOOH, FeNiCrMnCuOOH, FeNiCrMnMoOOH and FeNiCrMnCeOOH were synthesized following a process similar to that for FeNiCrMnCoOOH/NF.

### **Characterization**

Powder X-ray diffraction (XRD) patterns were collected using a Shimadzu XRD-6000 with Cu K $\alpha$  radiation (40 kV, 30 mA). HRTEM images were recorded on a JEM-2100 transmission electron microscope (Tokyo, Japan) at 200 kV. SEM images were recorded on a HITACHI SU8020 field emission scanning electron microscope. Raman spectra were acquired using a Renishaw micro-Raman spectrometer with a 532 nm laser at 0.2 mW. The valence state was determined using XPS recorded on a Thermo ESCALAB 250Xi. The X-ray source selected was monochromatized Al K $\alpha$  source (15 kV, 10.8 mA). Region scans were collected using 30 eV pass energy. Peak positions were calibrated relative to C 1s peak position at 284.6 eV.

### **Electrochemical measurements**

All electrochemical measurements were performed on a CHI760E electrochemical working station at room temperature. The catalysts were measured in 1 M KOH aqueous solution using a typical three-electrode configuration. Linear sweep voltammetry (LSV) polarization curves were acquired at a scan rate of 5 mV $\cdot$ s<sup>-1</sup>. Electrochemical impedance spectroscopy (EIS) measurements were performed at open-circuit potential in the frequency range from 100 kHz to 0.1 Hz with an a.c.

perturbation of 5 mV. All potentials measured were calibrated to RHE using the following equation:  $E \text{ (versus RHE)} = E \text{ (versus SCE)} + 0.241 \text{ V} + 0.0591 \text{ pH}$ .

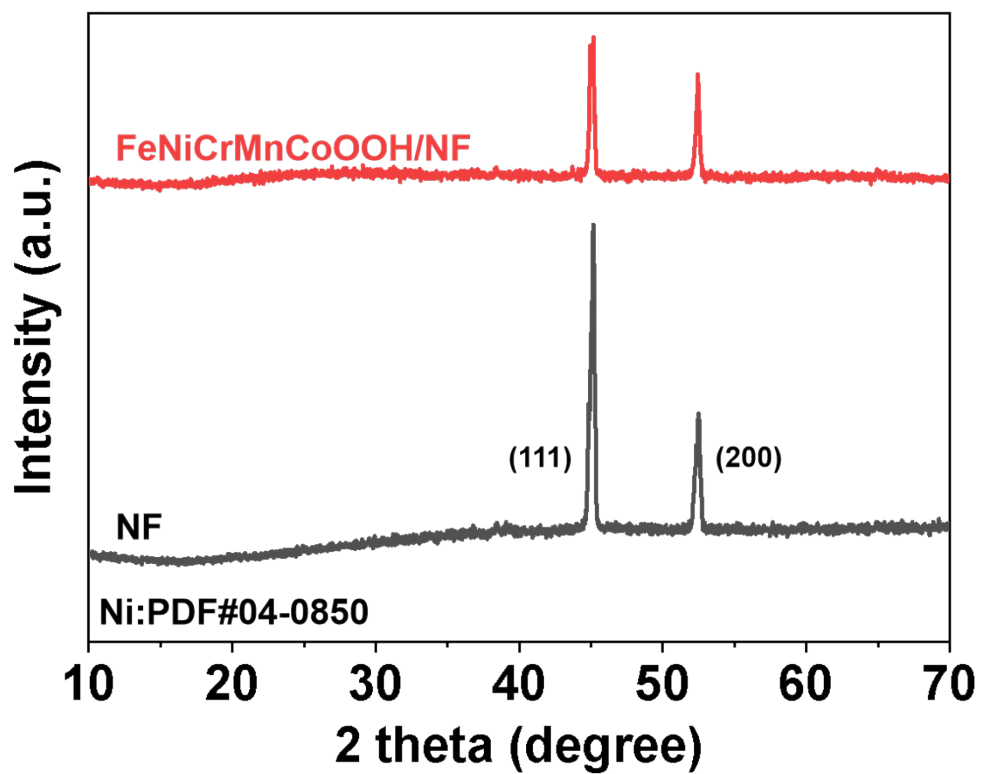

Fig. S1. XRD patterns of NF and FeNiCrMnCoOOH/NF.

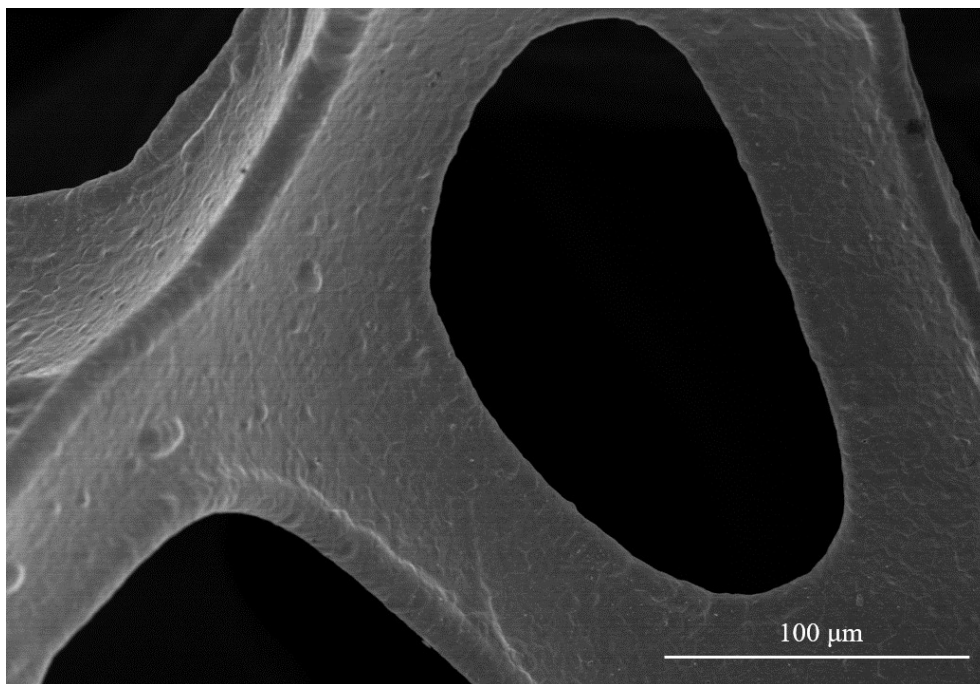

**Fig. S2.** SEM image of NF.

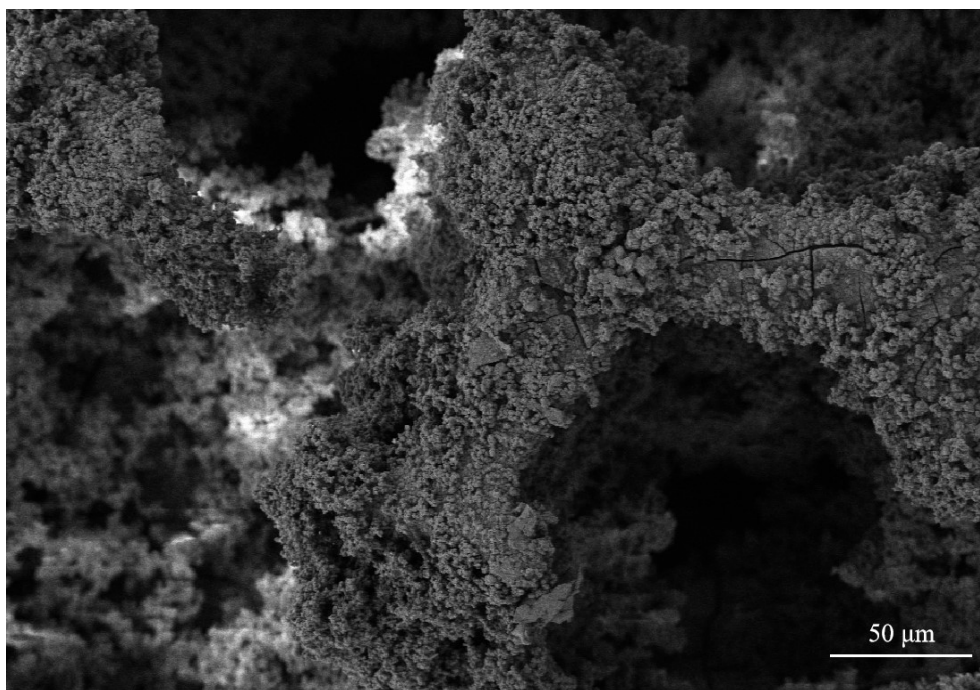

**Fig. S3.** SEM image of FeNiCrMnCoOOH/NF.

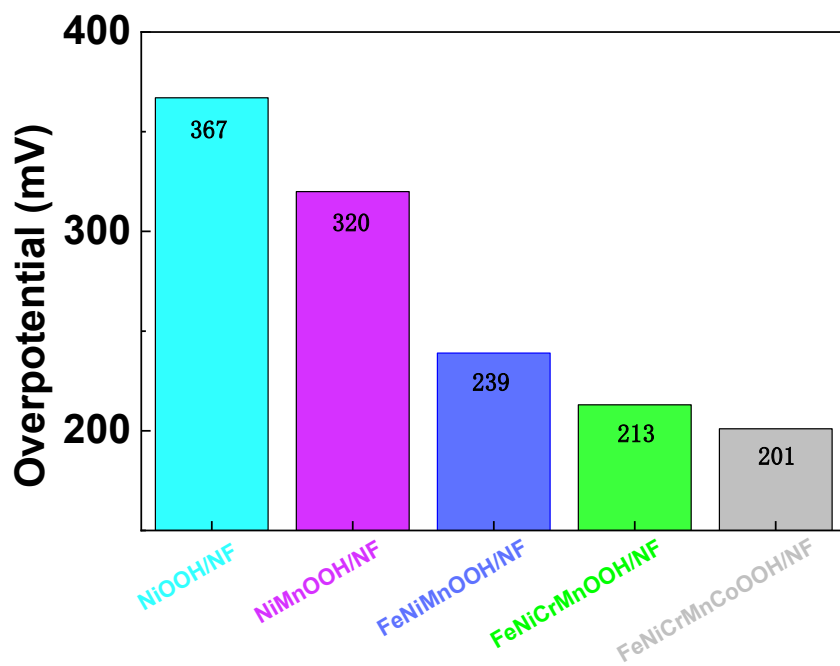

Fig. S4. Overpotential comparison at  $10 \text{ mA cm}^{-2}$ .

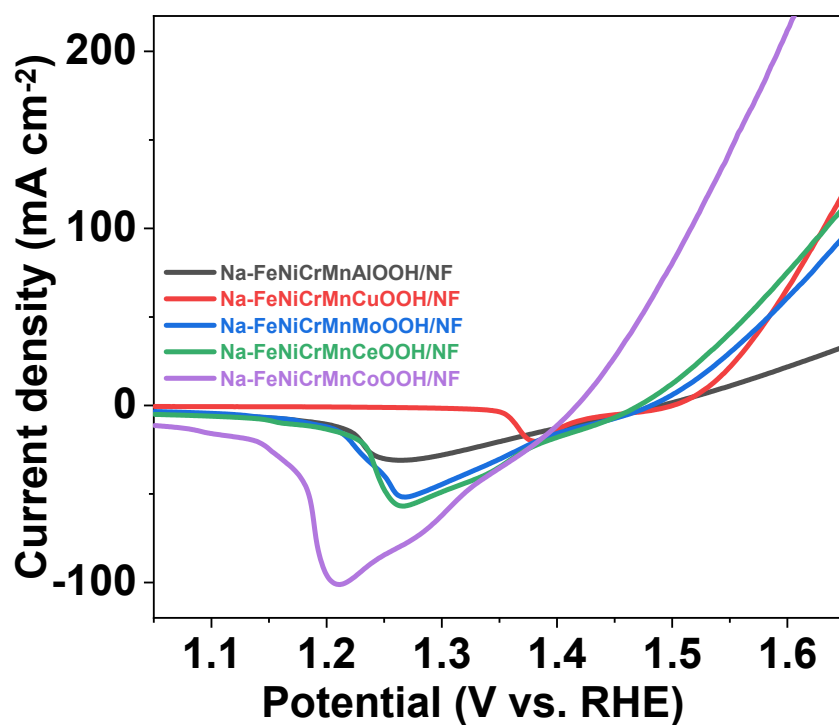

Fig. S5. LSV curves of FeNiCrMnAlOOH/NF, FeNiCrMnCuOOH/NF, FeNiCrMnMoOOH/NF, FeNiCrMnCeOOH/NF and FeNiCrMnCoOOH/NF.

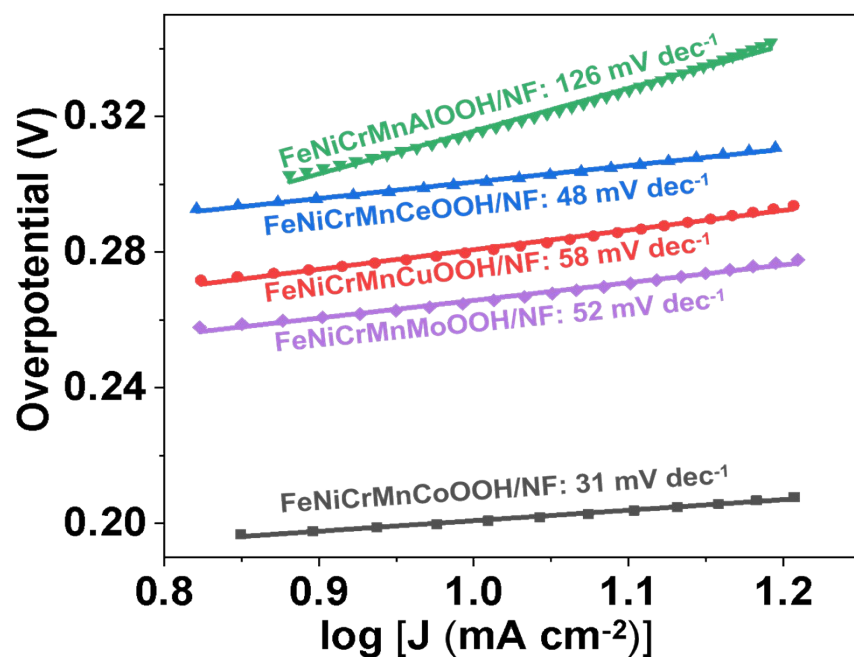

Fig. S6. Tafel slopes of FeNiCrMnAlOOH/NF, FeNiCrMnCuOOH/NF, FeNiCrMnMoOOH/NF, FeNiCrMnCeOOH/NF and FeNiCrMnCoOOH/NF.

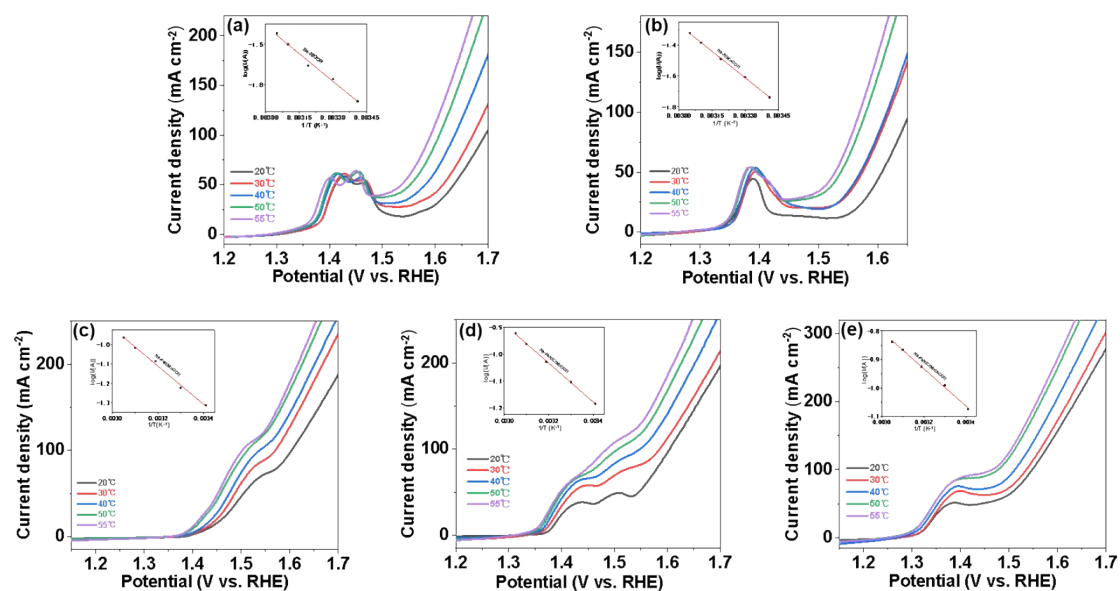

Fig. S7. OER polarization curves of NiOOH/NF, NiMnOOH/NF, FeNiMnOOH/NF, FeNiCrMnOOH/NF and FeNiCrMnCoOOH/NF in three-electrode configuration in 1 M KOH at 20 °C, 30 °C, 40 °C, 50 °C and 55 °C.

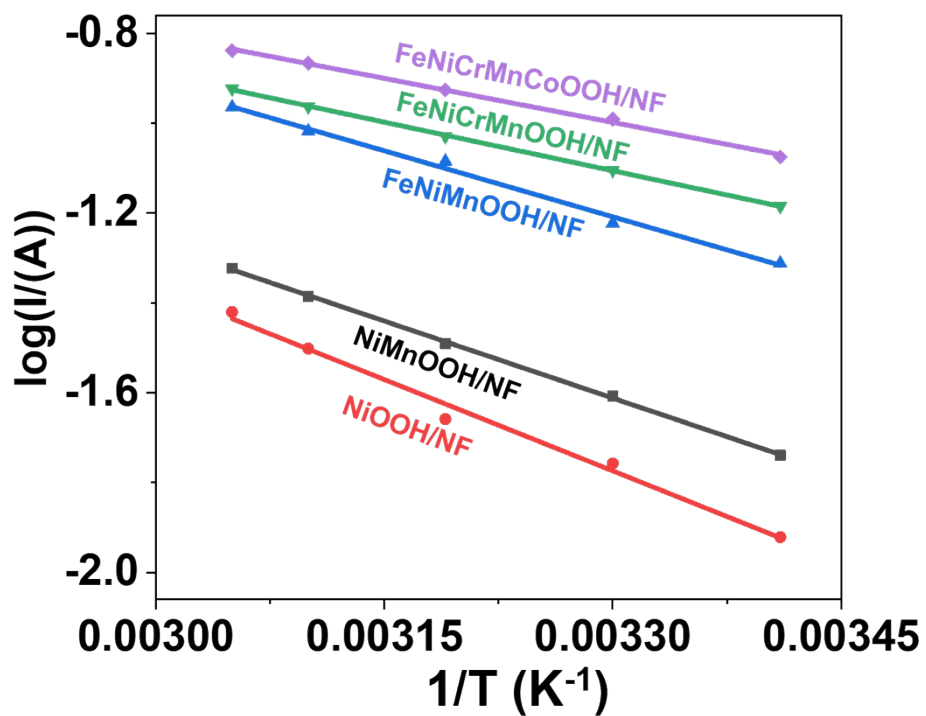

Fig. S8. Arrhenius plots.

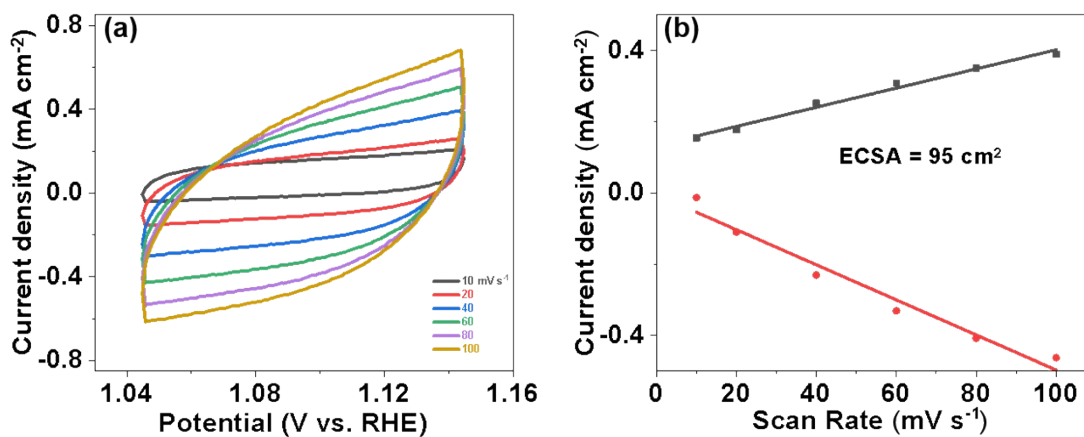

Fig. S9. (a) CVs of the FeNiCrMnCoOOH/NF measured in a non-Faradaic region at different scan Rate. (b) The cathodic and anodic currents measured as a function of the scan Rate.

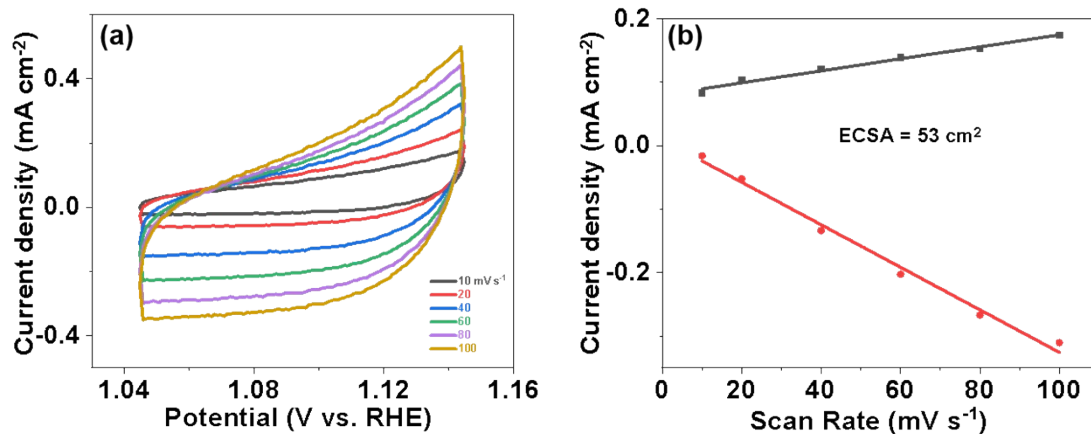

**Fig. S10.** (a) CVs of the NiOOH/NF measured in a non-Faradaic region at different scan Rate. (b) The cathodic and anodic currents measured as a function of the scan Rate.

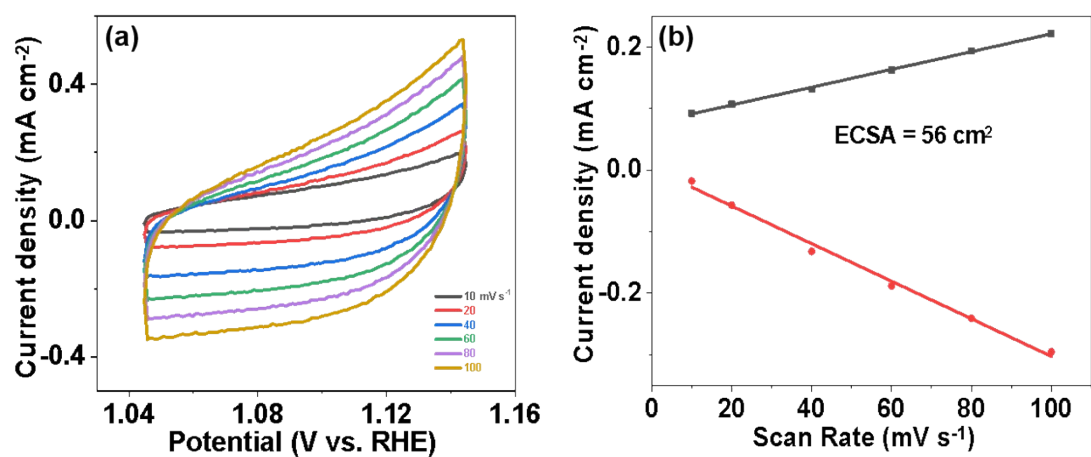

**Fig. S11.** (a) CVs of the NiMnOOH/NF measured in a non-Faradaic region at different scan Rate. (b) The cathodic and anodic currents measured as a function of the scan Rate.



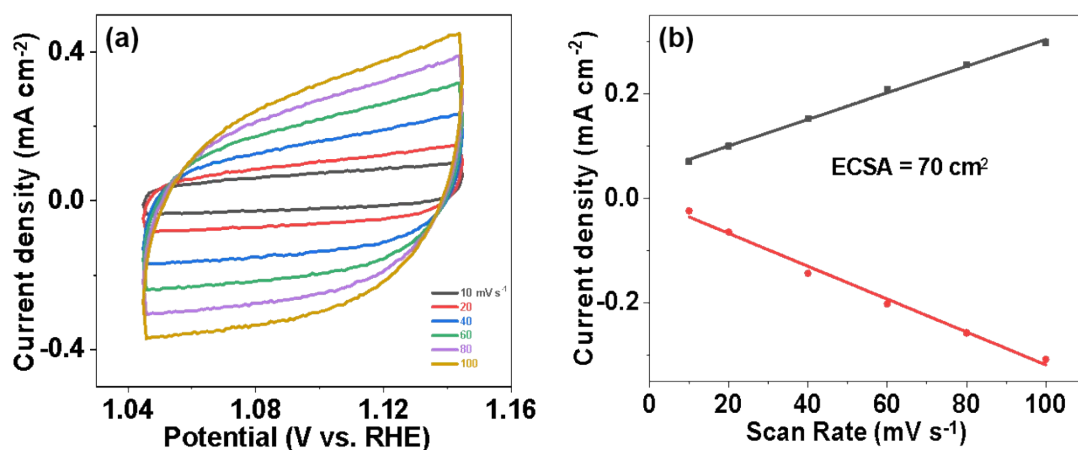

**Fig. S12.** (a) CVs of the FeNiMnOOH/NF measured in a non-Faradaic region at different scan Rate. (b) The cathodic and anodic currents measured as a function of the scan Rate.

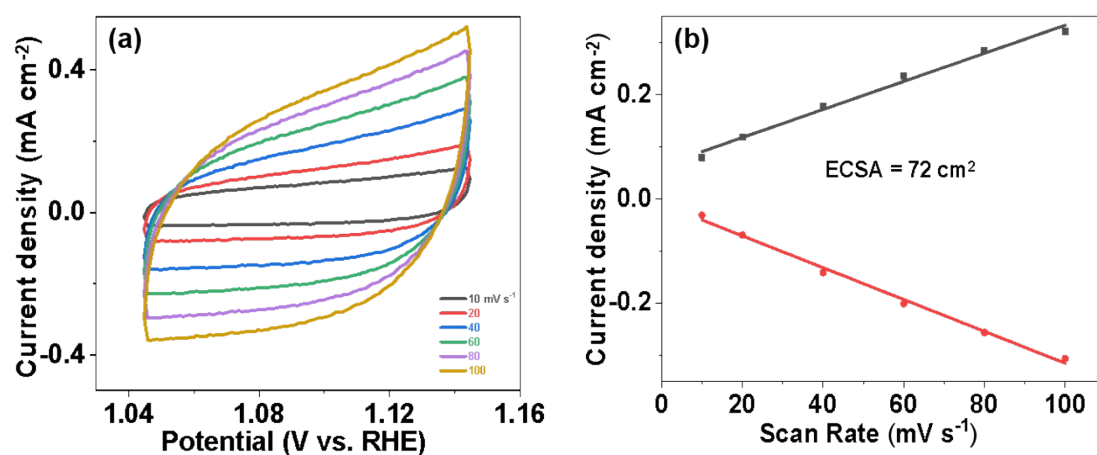

**Fig. S13.** (a) CVs of the FeNiCrMnOOH/NF measured in a non-Faradaic region at different scan Rate. (b) The cathodic and anodic currents measured as a function of the scan Rate.

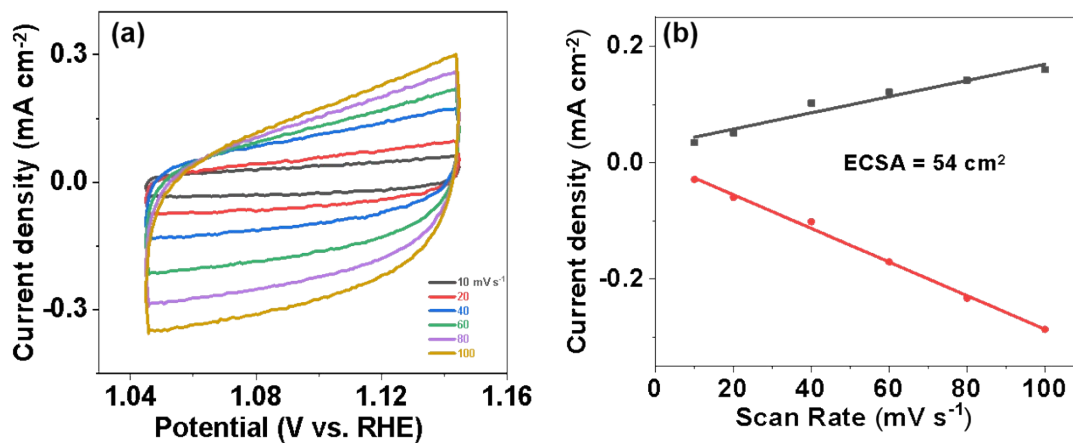

**Fig. S14.** (a) CVs of the FeNiCrMnAlOOH/NF measured in a non-Faradaic region at different scan Rate. (b) The cathodic and anodic currents measured as a function of the scan Rate.

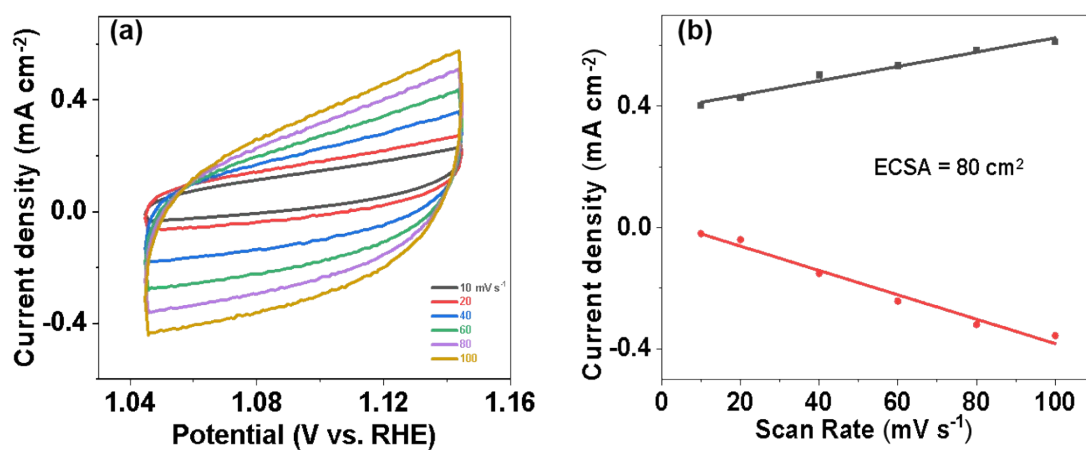

**Fig. S15.** (a) CVs of the FeNiCrMnCuOOH/NF measured in a non-Faradaic region at different scan Rate. (b) The cathodic and anodic currents measured as a function of the scan Rate.

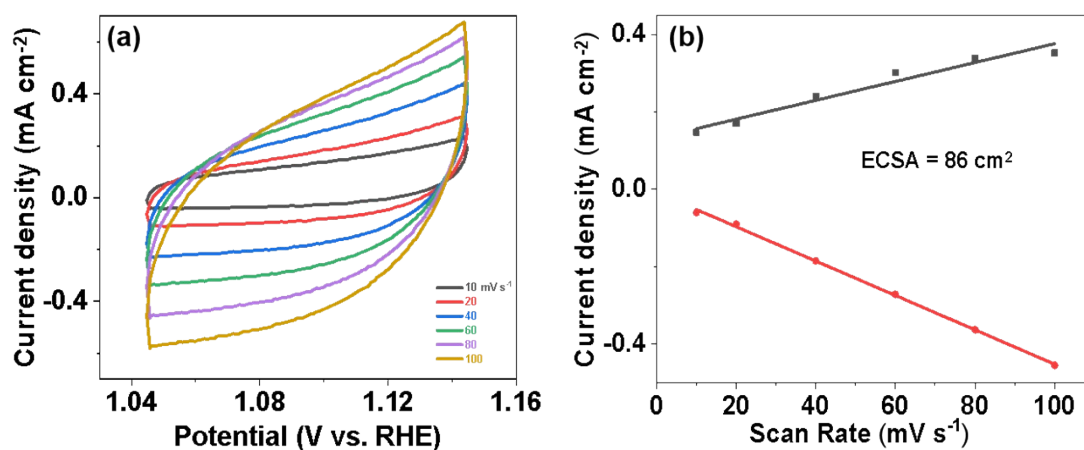

**Fig. S16.** (a) CVs of the FeNiCrMnMoOOH/NF measured in a non-Faradaic region at different scan Rate. (b) The cathodic and anodic currents measured as a function of the scan Rate.

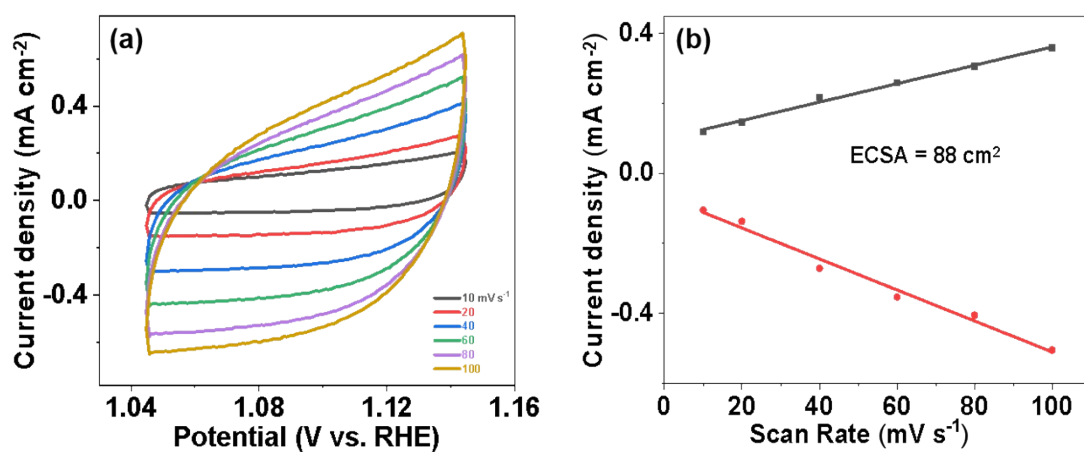

**Fig. S17.** (a) CVs of the FeNiCrMnCeOOH/NF measured in a non-Faradaic region at different scan Rate. (b) The cathodic and anodic currents measured as a function of the scan Rate.

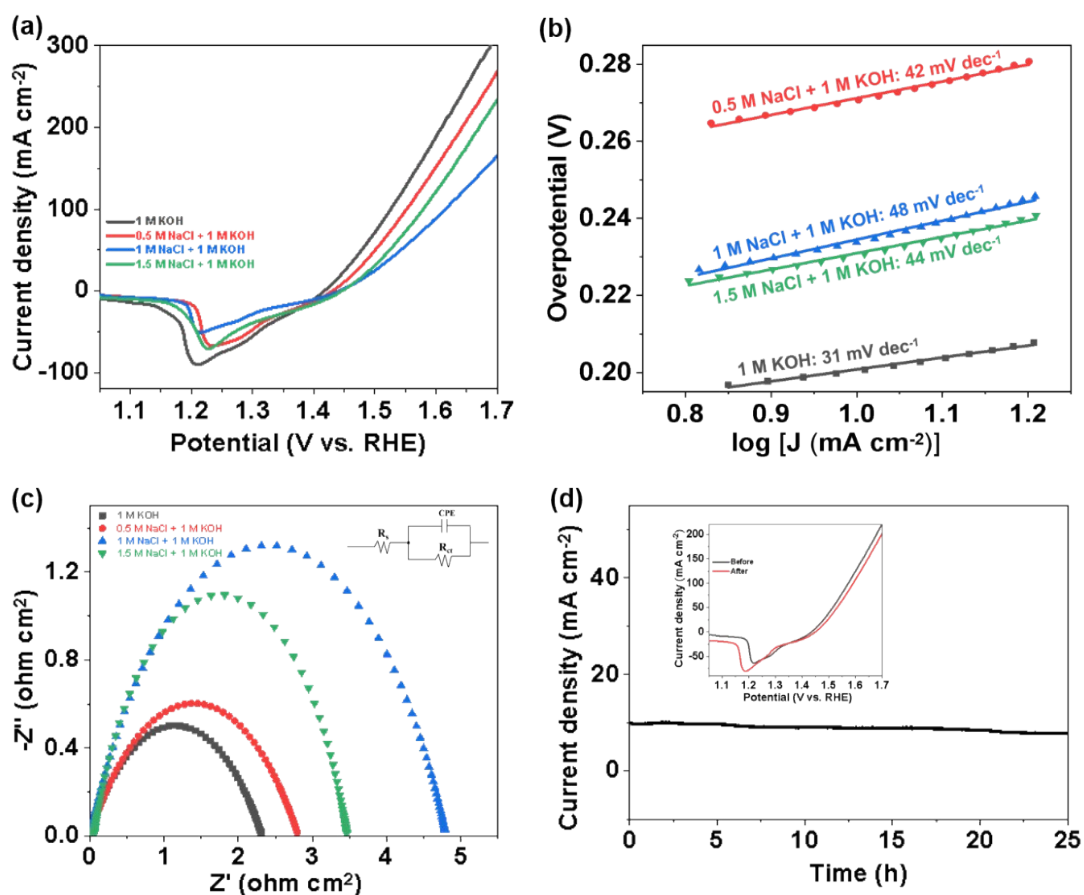

**Fig. S18.** (a) Electrochemical analysis in alkaline seawater. (b) Tafel slopes. (c) EIS plots (inset: equivalent circuit model corresponding to EIS data). (d) Chronoamperometric curves of the FeNiCrMnCoOOH/NF in 0.5 M NaCl + 1 M KOH.

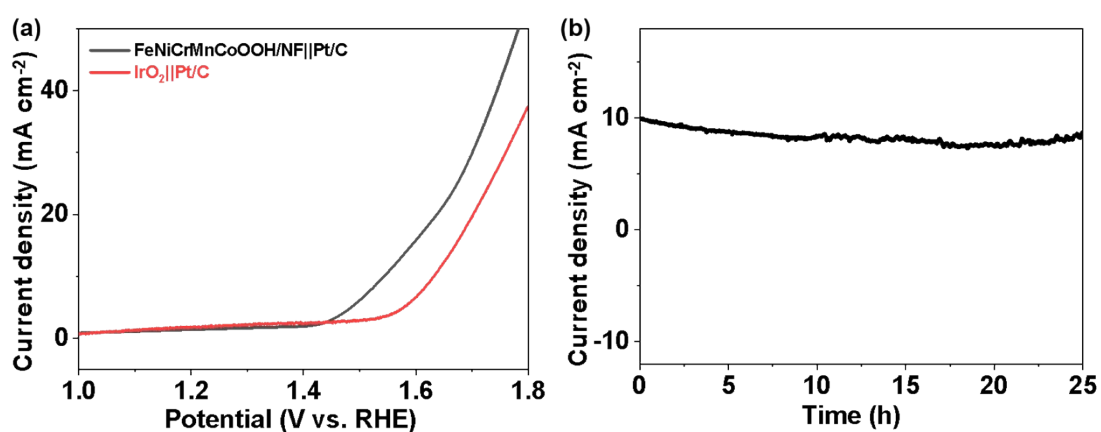

**Fig. S19.** (a) LSV curves of FeNiCrMnCoOOH/NF||Pt/C and IrO<sub>2</sub>||Pt/C of overall water splitting. (b) Stability test.

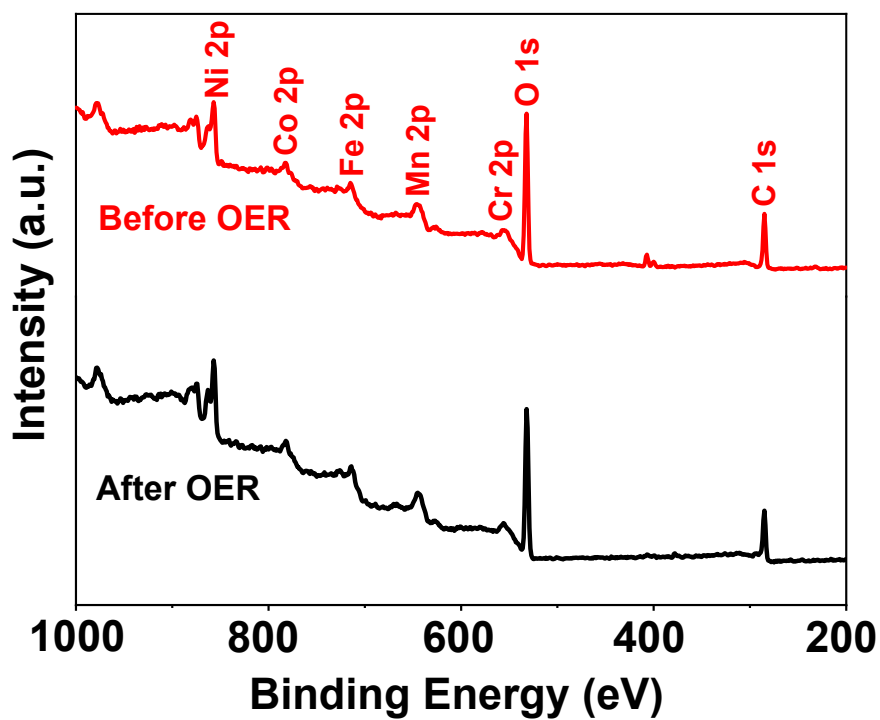

Fig. S20. XPS survey spectra of FeNiCrMnCoOOH/NF (before and after OER test).

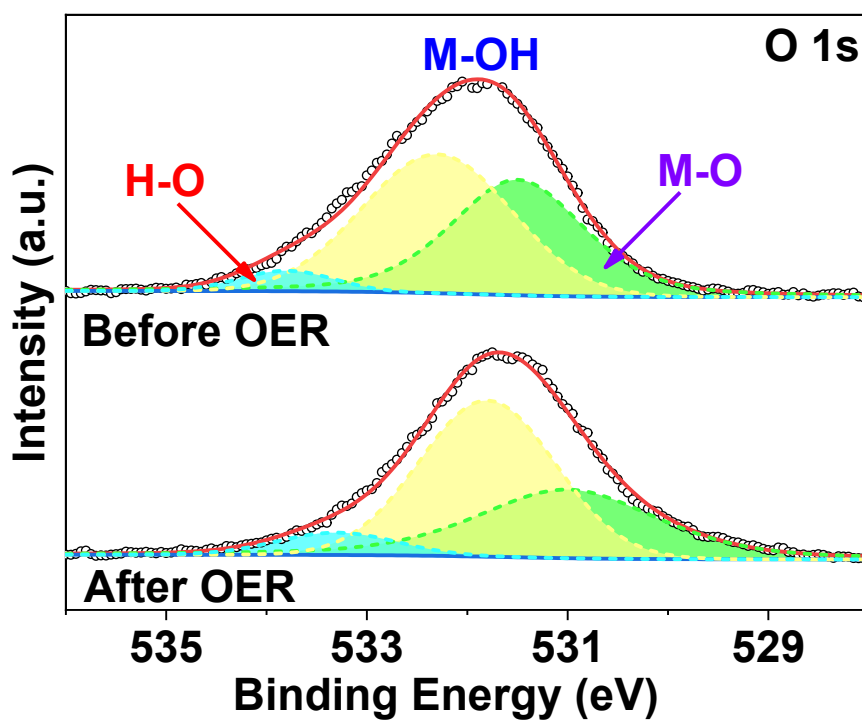

Fig. S21. High-resolution XPS spectrum for O 1s (before and after OER test).

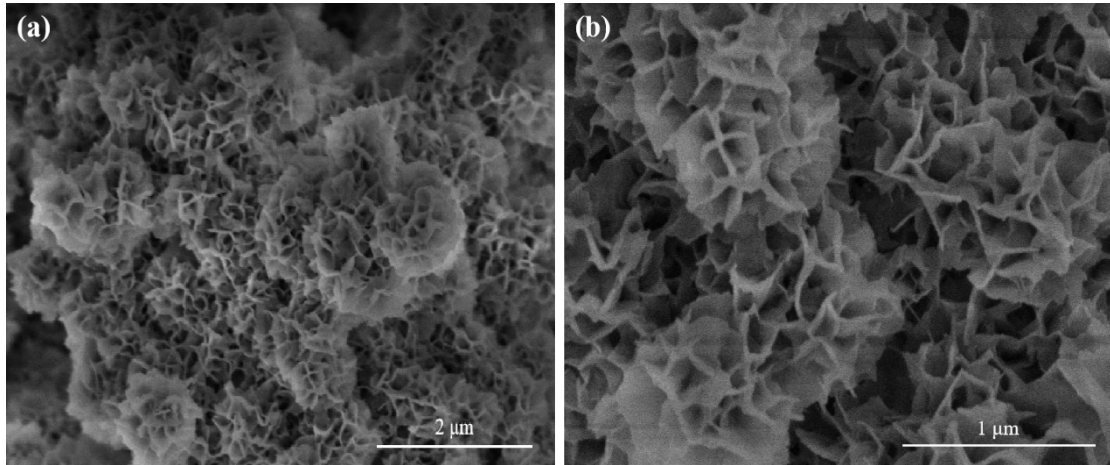

**Fig. S22.** (a, b) SEM images of FeNiCrMnCoOOH/NF after OER testing.

**Table S1.** Chemical composition of FeNiCrMnCoOOH/NF.

| catalyst         | Content (mol%) |        |        |        |        |
|------------------|----------------|--------|--------|--------|--------|
|                  | Fe             | Ni     | Cr     | Mn     | Co     |
| FeNiCrMnCoOOH/NF | 19.82%         | 22.36% | 20.44% | 18.95% | 18.43% |

**Table S2. Comparison of OER performance of FeNiCrMnCoOOH/NF with other (oxy)hydroxides in 1 M KOH**

| Catalyst                                     | $\eta@10 \text{ mA cm}^{-2}$<br>(mV) | Tafel slope<br>(mV dec <sup>-1</sup> ) | Ref.      |
|----------------------------------------------|--------------------------------------|----------------------------------------|-----------|
| FeNiCrMnCoOOH/NF                             | 201                                  | 31                                     | This work |
| Fe(Ni)OOH                                    | 300                                  | 34                                     | 1         |
| Te/FeNiOOH-NC                                | 220                                  | 52                                     | 2         |
| (Fe,Co)OOH/MI                                | 230                                  | 73                                     | 3         |
| (Ni <sub>7</sub> Fe <sub>3</sub> )OOH-S      | 238                                  | 42.7                                   | 4         |
| Fe-Co-OOH/Ni                                 | 250                                  | 40.28                                  | 5         |
| S-(Fe/Ni)OOH@NiNCAs-SSM                      | 245                                  | 65                                     | 6         |
| Fe(Cr)OOH/Fe <sub>3</sub> O <sub>4</sub> /NF | 198                                  | 34                                     | 7         |
| $\gamma$ -MnOOH/CoOOH-0.1                    | 313                                  | 87                                     | 8         |
| NiOOH@CoCu CH                                | 263                                  | 43.2                                   | 9         |
| FeNi-CoOOH NSs/CFC                           | 247                                  | 42.7                                   | 10        |
| Co <sub>3</sub> O <sub>4</sub> -CoOOH/CP     | 245                                  | 68.8                                   | 11        |
| Mo-NiOOH                                     | 310                                  | 68                                     | 12        |



## References

- 1 D. Tang, O. Mabayoje, Y. Q. Lai, Y. X. Liu and C. B. Mullins, *Chemistryselect*, 2017, **2**, 2230-2234.
- 2 S. Ibraheem, X. T. Li, S. S. A. Shah, T. Najam, G. Yasin, R. Iqbal, S. Hussain, W. Y. Ding and F. Shahzad, *ACS Appl. Mater. Inter.*, 2021, **13**, 10972-10978.
- 3 W. Z. Huang, J. T. Li, X. B. Liao, R. H. Lu, C. H. Ling, X. Liu, J. S. Meng, L. B. Qu, M. T. Lin, X. F. Hong, X. B. Zhou, S. L. Liu, Y. Zhao, L. Zhou and L. Q. Mai, *Adv. Mater.*, 2022, **34**, 2200270.
- 4 W. Liu, X. T. Wang, F. Wang, X. L. Liu, Y. Zhang, W. T. Li, Y. Z. Guo, H. Y. Yin and D. H. Wang, *Chem. Eng. J.*, 2023, **454**, 140030.
- 5 P. C. Wang, Z. A. Xu, Y. Q. Lin, L. Wan and B. G. Wang, *ACS Sustain. Chem. Eng.*, 2020, **8**, 8949-8957.
- 6 M. H. Kahnamouei and S. Shahrokhian, *ACS Appl. Energy Mater.*, 2021, **4**, 10627-10638.
- 7 L. Li, G. W. Zhang, B. Wang and S. C. Yang, *Appl. Catal., B*, 2022, **302**, 120847.
- 8 M. L. Cui, H. H. Zhao, X. P. Dai, Y. Yang, X. Zhang, X. B. Luan, F. Nie, Z. T. Ren, Y. Dong, Y. Wang, J. T. Yang and X. L. Huang, *ACS Sustain. Chem. Eng.*, 2019, **7**, 13015-13022.
- 9 B. Li, K. F. Wang, J. X. Ren and P. Qu, *New J. Chem.*, 2022, **46**, 7615-7625.
- 10 N. Ma, C. C. Gong, H. A. Xie, C. S. Shi, J. W. Sha, C. N. He, F. He, N. Q. Zhao and E. Z. Liu, *Int. J. Hydrogen Energy*, 2022, **47**, 29762-29770.
- 11 L. Yan and B. Zhang, *Int. J. Hydrogen Energy*, 2021, **46**, 34287-34297.
- 12 Y. S. Jin, S. L. Huang, X. Yue, C. Shu and P. K. Shen, *Int. J. Hydrogen Energy*, 2018, **43**, 12140-12145.
